# Supplementary material for: Genome-Wide Identification of Histone Deacetylases and Their Roles Related with Light Response in Tartary Buckwheat (Fagopyrum tataricum)
Source: MDPI journal article supplement (doi:10.3390/ijms24098090), 2023-04-30
Supplement: s1 [file s1]

## Supplementary Materials

Table S1. Summary of primers used in this study.

| Gene               | Forward(5'-3')            | Reverse(5'-3')            |
|--------------------|---------------------------|---------------------------|
| <b>For RT-qPCR</b> |                           |                           |
| <i>FiHDA2</i>      | ACCGGATTCTGTCGAGCAAG      | TGCGTCCCCATTTTGAGGAA      |
| <i>FiHDA5</i>      | TCCCTTCGAGTCAACATGGC      | CAGAATCAGAGCTCGGGCAT      |
| <i>FiHDA6-1</i>    | TTCTCTCCCCTGTCGGGAAT      | CCTGCAGAAGCCTGACAGAA      |
| <i>FiHDA6-2</i>    | TGGAGATCAACCGCCCTTTC      | CGCGAATGAGAGTGATCGGA      |
| <i>FiHDA8-1</i>    | AGGCTTTCTTGACGTCCTCG      | ATTCGGAGAGTGAAGCTGGC      |
| <i>FiHDA8-2</i>    | TGGCGGAAAGGAACTGTGTT      | GTATGTGCTTCATGGCTGCG      |
| <i>FiHDA9</i>      | GAGAACCTGACAAACGCCT       | AGCGTCGTCCATGTTGTGAT      |
| <i>FiHDA14</i>     | ATGCAGCGTCTTTTGTGCTG      | ATGACCAGAGGCAGGAGCTA      |
| <i>FiHDA19</i>     | GTTCACTCGGGGGATCTGTG      | CACGTACAAGACTCGCCCAT      |
| <i>FiSRT1</i>      | AAGGACAGATTGCGGGACAG      | AAGCTTCCCGCCATTACGAA      |
| <i>FiSRT2</i>      | ATGATGCAACGGTCTACGCA      | AACGCTTACCGGTTGTTCTT      |
| <i>FiHDT1</i>      | TGACTGGAACATGGGAGCG       | GCTTTTGTTCAGCTACCCC       |
| <i>FiHDT2</i>      | GAGCCAAGTAGTCCACCTTTCAC   | CAGACAGAATCCCAATCACCAAT   |
| <i>FiHDT3</i>      | TCATGTGGCAACCCCATACC      | CAAGAGCTGCAGGTAACGGA      |
| <i>FiH3</i>        | GAAATTCGCAAGTACCAGAAGAG   | CCAACAAGGTATGCCTCAGC      |
| <i>FiACTIN7</i>    | CCGCCACTCAACACAATGTTATTAT | GAGTTATGAGCTTCCTGATGGACAA |

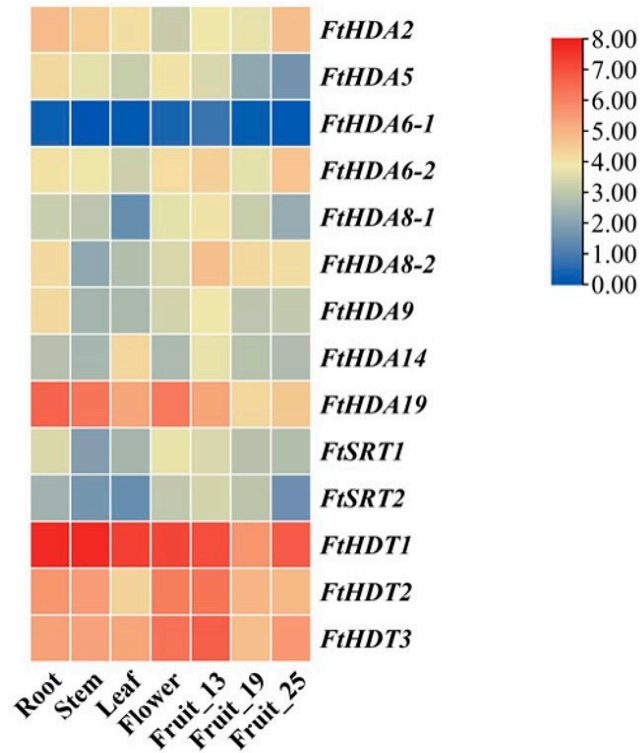

Figure S1. Expression patterns of 14 HDAC genes in diverse tissues of *F. tataricum*. RNA-seq data were downloaded from Tartary Buckwheat Database using gene IDs of 14 FtHDACs. The RPKM (Reads Per Kilobase of exon model per Million mapped reads) values were transformed to  $\log_2$  (value + 1) and used for heatmap. The expression in diverse *F. tataricum* tissues was demonstrated, including root, stem, leaf, flower, fruit\_13, fruit\_19 and fruit\_25.

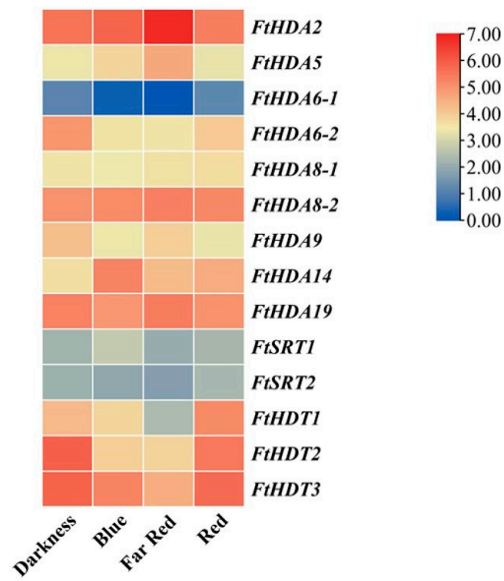

Figure S2. Expression profiles of 14 *FtHDAC* genes under different light wavelengths. The transcript profiles of *FtHDAC* genes in seedlings of *F. tataricum* under different light wavelengths (red light (670 nm), blue light (470 nm), and far-red light (735 nm)) were extracted from Zhang et al.[37]. The RPKM (Reads Per Kilobase of exon model per Million mapped reads) values were transformed to  $\log_2(\text{value} + 1)$  and used for heatmap.

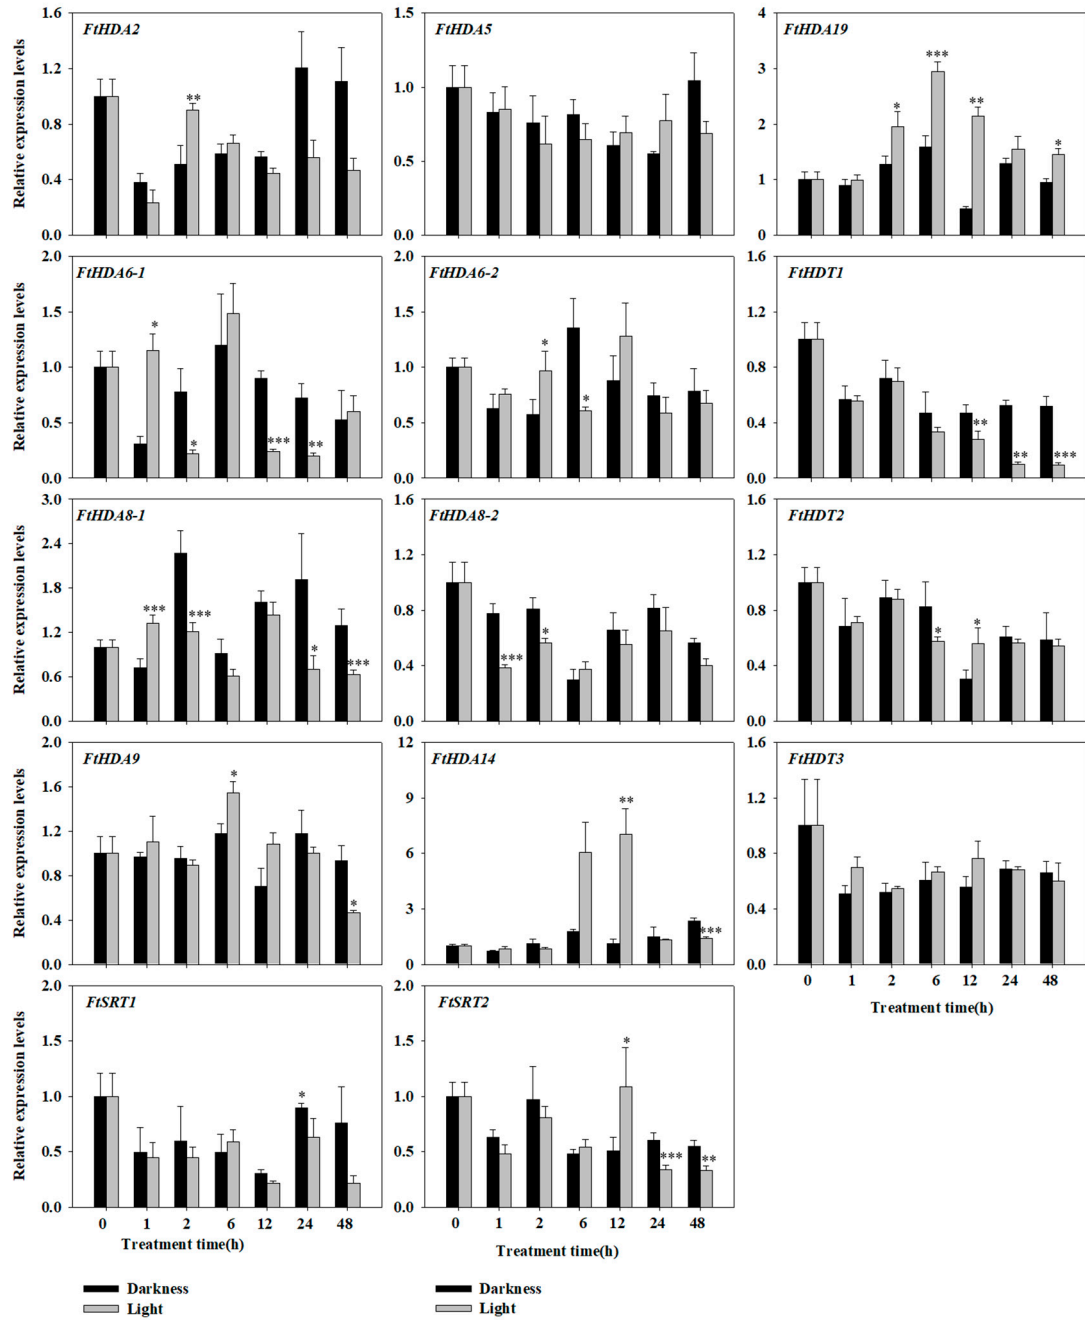

Figure S3. Expression profiles of 14 *FtHDAC* genes in response to light. *FtACTIN7* was used as reference gene. Expression levels of each gene were expressed as a ratio relative to that of untreated seedlings (Darkness 0 h), which was set as 1. Each data point represents a mean  $\pm$  standard error ( $n=3$ ). Asterisks above the bars indicate significant differences ( $p < 0.05$ ) among the treatments.
